# Supplementary material for: Complement component C5a induces aberrant epigenetic modifications in renal tubular epithelial cells accelerating senescence by Wnt4/βcatenin signaling after ischemia/reperfusion injury
Source: Aging (Albany NY). 2019 Jul 8;11(13):4382–406. doi: 10.18632/aging.102059 (PMC6660044; doi:10.18632/aging.102059)
Supplement: Supplementary Table 1 [file aging-11-102059-s001.xlsx]

## Sheet: Foglio1
id	Chromosome	Start	End	mean.mean.RPTEC_bas	mean.mean.RPTEC_C5a_24h	mean.mean.diff C5a	combinedRank	region	refgene_TSSpm1kb_Symbol_ol	all_mRNA_TSSpm1kb_ACC_ol	refgene_Symbol_ol	cpgIslandExt_ol	refgene_ID_ol	refgene_TSSpm1kb_Symbol_ln
472939	chr15	57375001	57380000	0.263388	0.354063	0.0906746	149	chr15:57375001-57380000			TCF12 // TCF12 // TCF12 // TCF12		NM_003205 // NM_207037 // NM_207036 // NM_207038	TCF12
361164	chr10	125420001	125425000	0.311243	0.237884	-0.0733597	225	chr10:125420001-125425000	GPR26	AJ505757 // BC113462 // BC112011				BUB3
450396	chr14	52010001	52015000	0.173303	0.242198	0.0688952	304	chr14:52010001-52015000			FRMD6-AS2 // FRMD6 // FRMD6-AS2		NR_051990 // NM_001042481 // NR_047477	FRMD6
103629	chr3	25685001	25690000	0.144715	0.212796	0.0680804	318	chr3:25685001-25690000			TOP2B		NM_001068	RARB
439165	chr13	111025001	111030000	0.168577	0.235481	0.0669036	349	chr13:111025001-111030000			COL4A2		NM_001846	MIR8073
67873	chr2	90105001	90110000	0.17806	0.243837	0.0657769	378	chr2:90105001-90110000						MIR4436A
182799	chr5	32355001	32360000	0.515995	0.409998	-0.105997	386	chr5:32355001-32360000			ZFR		NM_016107	MTMR12
215974	chr6	17310001	17315000	0.182987	0.117543	-0.0654434	387	chr6:17310001-17315000						RBM24
416217	chr12	130140001	130145000	0.237946	0.299101	0.0611554	516	chr12:130140001-130145000			TMEM132D		NM_133448	LOC101927735
348405	chr10	61625001	61630000	0.21912	0.279223	0.0601024	547	chr10:61625001-61630000			CCDC6		NM_005436	LINC00948
376363	chr11	65880001	65885000	0.216266	0.274604	0.0583383	619	chr11:65880001-65885000			PACS1		NM_018026	PACS1
505649	chr17	28035001	28040000	0.127066	0.185054	0.057988	636	chr17:28035001-28040000			SSH2 // SSH2 // SSH2 // SSH2		NM_033389 // NM_001282129 // NM_001282130 // NM_001282131	CORO6
230211	chr6	88495001	88500000	0.285269	0.349856	0.0645869	638	chr6:88495001-88500000	LOC101928911	AY927641 // AY927642	LOC101928911		NR_110869	AKIRIN2
206364	chr5	150180001	150185000	0.174689	0.232172	0.0574824	655	chr5:150180001-150185000						SMIM3
513344	chr17	66510001	66515000	0.278894	0.221954	-0.0569403	680	chr17:66510001-66515000	PRKAR1A	AK097580 // EF428111 // EF428110 // DQ891775 // DQ894959 // AB384780	PRKAR1A // PRKAR1A // PRKAR1A // PRKAR1A // PRKAR1A // PRKAR1A		NM_001278433 // NM_212471 // NM_212472 // NM_002734 // NM_001276289 // NM_001276290	PRKAR1A
8079	chr1	40390001	40395000	0.114957	0.177683	0.0627261	724	chr1:40390001-40395000						MYCL
130410	chr3	159590001	159595000	0.131653	0.187646	0.0559924	731	chr3:159590001-159595000			IQCJ-SCHIP1 // IQCJ-SCHIP1 // SCHIP1 // SCHIP1 // SCHIP1 // SCHIP1		NM_001197114 // NM_001197113 // NM_014575 // NM_001197107 // NM_001197108 // NM_001197109	SCHIP1
491452	chr16	47405001	47410000	0.80768	0.667857	-0.139823	746	chr16:47405001-47410000		AL833705	ITFG1		NM_030790	LOC101927102
493318	chr16	56735001	56740000	0.118161	0.172922	0.0547605	790	chr16:56735001-56740000						MT1X
129732	chr3	156200001	156205000	0.147401	0.202078	0.0546779	796	chr3:156200001-156205000			KCNAB1 // KCNAB1 // KCNAB1		NM_172160 // NM_003471 // NM_172159	KCNAB1-AS1
382400	chr11	96065001	96070000	0.116833	0.171101	0.0542684	819	chr11:96065001-96070000			MAML2		NM_032427	MTMR2
265120	chr7	91920001	91925000	0.161743	0.215877	0.0541339	826	chr7:91920001-91925000		AB385463	ANKIB1		NM_019004	ANKIB1
541790	chr19	49460001	49465000	0.753855	0.62831	-0.125546	828	chr19:49460001-49465000		JA397961 // CU680817	BAX // BAX // BAX // BAX // BAX // BAX // BAX // BAX // BAX		NM_004324 // NM_001291431 // NM_001291429 // NM_001291428 // NM_138764 // NM_138761 // NM_001291430 // NM_138763 // NR_027882	BAX
439304	chr13	111720001	111725000	0.208577	0.262512	0.0539346	837	chr13:111720001-111725000				CpG:		ANKRD10
400432	chr12	51215001	51220000	0.104919	0.15884	0.0539209	840	chr12:51215001-51220000						ATF1
30069	chr1	150340001	150345000	0.218257	0.27729	0.0590323	842	chr1:150340001-150345000			RPRD2		NM_015203	RPRD2
351807	chr10	78635001	78640000	0.628627	0.52581	-0.102817	875	chr10:78635001-78640000			KCNMA1 // KCNMA1		NM_001014797 // NM_001271518	C10orf11
260010	chr7	66370001	66375000	0.541689	0.453625	-0.0880641	895	chr7:66370001-66375000		AK301184 // DQ595154 // DQ574669				GTF2IRD1P1
57533	chr2	38405001	38410000	0.780573	0.654642	-0.12593	902	chr2:38405001-38410000			CYP1B1-AS1		NR_027252	CYP1B1-AS1
458308	chr14	91570001	91575000	0.737303	0.619106	-0.118197	920	chr14:91570001-91575000						RPS6KA5
235151	chr6	113195001	113200000	0.143136	0.195548	0.0524121	935	chr6:113195001-113200000						RFPL4B
71676	chr2	109120001	109125000	0.719809	0.605438	-0.114371	951	chr2:109120001-109125000		AK022838	GCC2 // GCC2		NM_181453 // NR_028063	GCC2
235043	chr6	112655001	112660000	0.167478	0.219663	0.0521845	954	chr6:112655001-112660000						LAMA4
286109	chr8	37725001	37730000	0.438234	0.380092	-0.0581422	960	chr8:37725001-37730000		AK026177 // AL833169 // AL832155 // AK090437 // AK122583 // AY367050 // AY280967 // AY280969 // AY280966	RAB11FIP1 // RAB11FIP1		NM_001002814 // NM_025151	BRF2
118531	chr3	100195001	100200000	0.554242	0.466771	-0.0874717	990	chr3:100195001-100200000						TOMM70A
552514	chr20	43950001	43955000	0.719735	0.597385	-0.12235	1000	chr20:43950001-43955000			SDC4		NM_002999	MATN4
46937	chr1	234680001	234685000	0.168714	0.220207	0.0514925	1002	chr1:234680001-234685000						LOC100506795
378080	chr11	74465001	74470000	0.210229	0.279438	0.0692092	1032	chr11:74465001-74470000		JC172327	RNF169		NM_001098638	RNF169
57940	chr2	40440001	40445000	0.246952	0.306463	0.0595105	1051	chr2:40440001-40445000			SLC8A1-AS1 // SLC8A1 // SLC8A1 // SLC8A1 // SLC8A1 // SLC8A1		NR_038441 // NM_001112800 // NM_001112801 // NM_001252624 // NM_021097 // NM_001112802	SLC8A1-AS1
563325	chr21	34975001	34980000	0.128775	0.179613	0.0508384	1056	chr21:34975001-34980000			CRYZL1		NM_145858	DONSON
409211	chr12	95110001	95115000	0.657106	0.543913	-0.113192	1075	chr12:95110001-95115000						TMCC3
108023	chr3	47655001	47660000	0.789725	0.669595	-0.12013	1082	chr3:47655001-47660000			SMARCC1		NM_003074	CSPG5
472558	chr15	55470001	55475000	0.784712	0.665415	-0.119297	1084	chr15:55470001-55475000		BX640811 // CU688539	RSL24D1		NM_016304	UNC13C
338326	chr10	11230001	11235000	0.765642	0.649466	-0.116176	1092	chr10:11230001-11235000			CELF2 // CELF2 // CELF2 // CELF2		NM_001025077 // NM_006561 // NM_001083591 // NM_001025076	CELF2
368201	chr11	25070001	25075000	0.620956	0.731801	0.110845	1099	chr11:25070001-25075000			LUZP2 // LUZP2 // LUZP2		NM_001252008 // NM_001252010 // NM_001009909	LUZP2
101820	chr3	16640001	16645000	0.111326	0.161464	0.0501385	1115	chr3:16640001-16645000		AB528545 // EU176226	DAZL // DAZL		NM_001190811 // NM_001351	LINC00690
304504	chr8	129700001	129705000	0.677863	0.549093	-0.12877	1138	chr8:129700001-129705000						MIR1208
234067	chr6	107775001	107780000	0.739625	0.629553	-0.110072	1163	chr6:107775001-107780000	PDSS2	DQ578214 // AB210839 // AK000293 // AF254956 // BC039906 // AK315804 // AK225629 // AK301480 // AK296717 // BC029491	PDSS2		NM_020381	BEND3
304736	chr8	130860001	130865000	0.735041	0.626162	-0.108879	1173	chr8:130860001-130865000			FAM49B // FAM49B // FAM49B // FAM49B // FAM49B		NM_001256763 // NR_046361 // NM_016623 // NR_046360 // NR_046359	GSDMC
19705	chr1	98520001	98525000	0.548275	0.643651	0.0953763	1177	chr1:98520001-98525000						MIR137HG
75511	chr2	128295001	128300000	0.792437	0.676555	-0.115882	1205	chr2:128295001-128300000			MYO7B		NM_001080527	MYO7B
404806	chr12	73085001	73090000	0.405956	0.310016	-0.0959392	1212	chr12:73085001-73090000						TRHDE-AS1
299429	chr8	104325001	104330000	0.308508	0.362025	0.053517	1220	chr8:104325001-104330000			FZD6 // FZD6 // FZD6		NM_001164615 // NM_003506 // NM_001164616	FZD6
266525	chr7	98945001	98950000	0.797436	0.68142	-0.116016	1222	chr7:98945001-98950000		DQ587708	ARPC1A // ARPC1A		NM_001190996 // NM_006409	ARPC1A
484774	chr16	14015001	14020000	0.107248	0.161513	0.0542646	1235	chr16:14015001-14020000	ERCC4	BC142631 // AK289726 // BC160102 // BC113107 // U64315 // BC020741 // AK308341 // DQ598409	ERCC4		NM_005236	SHISA9
375642	chr11	62275001	62280000	0.73294	0.626878	-0.106062	1245	chr11:62275001-62280000			AHNAK		NM_024060	SCGB1A1
511561	chr17	57595001	57600000	0.197234	0.264685	0.0674507	1259	chr17:57595001-57600000			LOC101927728		NR_110813	MIR4729
408054	chr12	89325001	89330000	0.144647	0.206701	0.0620544	1307	chr12:89325001-89330000						KITLG
556176	chr20	62260001	62265000	0.526799	0.451684	-0.0751158	1311	chr20:62260001-62265000						GMEB2
132500	chr3	170040001	170045000	0.155125	0.223202	0.0680775	1349	chr3:170040001-170045000						PRKCI
32773	chr1	163860001	163865000	0.477946	0.556426	0.0784807	1349	chr1:163860001-163865000						LOC100422212
18218	chr1	91085001	91090000	0.75413	0.649553	-0.104578	1394	chr1:91085001-91090000		JC172240				ZNF326
190664	chr5	71680001	71685000	0.158462	0.219385	0.0609233	1405	chr5:71680001-71685000						PTCD2
502421	chr17	11895001	11900000	0.807432	0.696468	-0.110964	1430	chr17:11895001-11900000	ZNF18	AK057783 // AB464379 // CU690294 // EU446908 // BC036096 // AX747657 // AK092656 // AY491053 // AK127908	ZNF18		NM_144680	DNAH9
198646	chr5	111590001	111595000	0.572838	0.494395	-0.0784438	1456	chr5:111590001-111595000			EPB41L4A // LOC101927023		NM_022140 // NR_110559	LOC101927023
399579	chr12	46950001	46955000	0.776925	0.66443	-0.112495	1468	chr12:46950001-46955000						SLC38A2
470470	chr15	45030001	45035000	0.168991	0.22355	0.0545584	1488	chr15:45030001-45035000			TRIM69 // TRIM69		NM_080745 // NM_182985	TRIM69
415066	chr12	124385001	124390000	0.194477	0.13113	-0.0633471	1503	chr12:124385001-124390000			DNAH10		NM_207437	DNAH10
12921	chr1	64600001	64605000	0.691829	0.598894	-0.0929354	1521	chr1:64600001-64605000			ROR1 // ROR1		NM_005012 // NM_001083592	LOC101927034
130547	chr3	160275001	160280000	0.803823	0.696253	-0.10757	1529	chr3:160275001-160280000			KPNA4		NM_002268	SCARNA7
521076	chr18	23970001	23975000	0.753547	0.653725	-0.0998221	1584	chr18:23970001-23975000		BC032791 // BC016360	TAF4B		NM_005640	TAF4B
399443	chr12	46270001	46275000	0.739295	0.641473	-0.0978218	1593	chr12:46270001-46275000			ARID2		NM_152641	ARID2
542427	chr19	52645001	52650000	0.335065	0.265167	-0.0698974	1616	chr19:52645001-52650000						ZNF616
429202	chr13	61210001	61215000	0.697625	0.606385	-0.0912404	1645	chr13:61210001-61215000		DD413682 // CQ873845				TDRD3
44051	chr1	220250001	220255000	0.728353	0.633526	-0.0948266	1660	chr1:220250001-220255000			RNU5F-1 // BPNT1 // BPNT1 // BPNT1 // BPNT1		NR_002753 // NM_001286149 // NM_006085 // NM_001286150 // NM_001286151	EPRS
403075	chr12	64430001	64435000	0.422638	0.485461	0.0628233	1707	chr12:64430001-64435000			SRGAP1		NM_020762	SRGAP1
372408	chr11	46105001	46110000	0.794735	0.694492	-0.100242	1800	chr11:46105001-46110000		AB384262 // EU446805 // AY090777	PHF21A // PHF21A		NM_001101802 // NM_016621	GYLTL1B
276482	chr7	148730001	148735000	0.767597	0.670904	-0.0966928	1805	chr7:148730001-148735000						PDIA4
437116	chr13	100780001	100785000	0.257321	0.309571	0.0522507	1808	chr13:100780001-100785000			PCCA // PCCA // PCCA		NM_001127692 // NM_001178004 // NM_000282	PCCA
360034	chr10	119770001	119775000	0.617666	0.528567	-0.0890988	1858	chr10:119770001-119775000			RAB11FIP2		NM_014904	EMX2OS
455616	chr14	78110001	78115000	0.567156	0.647633	0.0804765	1889	chr14:78110001-78115000						SPTLC2
466470	chr15	25030001	25035000	0.481574	0.549876	0.0683023	1909	chr15:25030001-25035000						NPAP1
188647	chr5	61595001	61600000	0.59604	0.522291	-0.0737491	1924	chr5:61595001-61600000						LOC100506526
351107	chr10	75135001	75140000	0.780719	0.685138	-0.0955804	1954	chr10:75135001-75140000		M64272 // CU678075	ANXA7 // ANXA7		NM_004034 // NM_001156	TTC18
303673	chr8	125545001	125550000	0.751889	0.659912	-0.0919769	1960	chr8:125545001-125550000			TATDN1 // TATDN1 // TATDN1		NR_027427 // NM_001146160 // NM_032026	MIR6844
250784	chr7	20240001	20245000	0.275757	0.338478	0.0627206	1987	chr7:20240001-20245000			MACC1		NM_182762	MACC1-AS1
239631	chr6	135595001	135600000	0.204556	0.256729	0.0521731	1996	chr6:135595001-135600000						MYB
400225	chr12	50180001	50185000	0.80787	0.709791	-0.0980797	2001	chr12:50180001-50185000		BC020433	NCKAP5L		NM_001037806	TMBIM6
395130	chr12	24705001	24710000	0.789851	0.694022	-0.0958284	2006	chr12:24705001-24710000			SOX5 // SOX5		NM_152989 // NM_001261414	MIR920
161289	chr4	115960001	115965000	0.243178	0.29938	0.0562023	2010	chr4:115960001-115965000			NDST4		NM_022569	MIR577
203161	chr5	134165001	134170000	0.802346	0.705223	-0.0971228	2017	chr5:134165001-134170000		CU680283 // BC030755	DDX46		NM_014829	DDX46
505458	chr17	27080001	27085000	0.583553	0.51282	-0.0707321	2033	chr17:27080001-27085000		CU676883	FAM222B // FAM222B // FAM222B // FAM222B // FAM222B // FAM222B // FAM222B // FAM222B // FAM222B // FAM222B // FAM222B // FAM222B		NM_001288636 // NM_018182 // NM_001288633 // NM_001077498 // NM_001288639 // NM_001288631 // NM_001288634 // NM_001288632 // NM_001288637 // NM_001288635 // NM_001288638 // NM_001288640	TRAF4
393412	chr12	16115001	16120000	0.721388	0.635015	-0.0863726	2070	chr12:16115001-16120000			DERA		NM_015954	DERA
454345	chr14	71755001	71760000	0.730093	0.644088	-0.0860045	2147	chr14:71755001-71760000						PCNX
575076	chr22	45600001	45605000	0.520568	0.459162	-0.0614066	2169	chr22:45600001-45605000		BC016882 // AK025608	KIAA0930 // KIAA0930		NM_001009880 // NM_015264	MIR1249
359410	chr10	116650001	116655000	0.563192	0.496852	-0.0663394	2170	chr10:116650001-116655000			FAM160B1		NM_001135051	FAM160B1
206556	chr5	151140001	151145000	0.768107	0.678167	-0.0899402	2181	chr5:151140001-151145000		JC172351				ATOX1
395274	chr12	25425001	25430000	0.423959	0.346676	-0.0772831	2197	chr12:25425001-25430000						KRAS
11194	chr1	55965001	55970000	0.509221	0.44949	-0.0597305	2208	chr1:55965001-55970000						MIR4422
394213	chr12	20120001	20125000	0.368283	0.311428	-0.0568549	2256	chr12:20120001-20125000						AEBP2
90755	chr2	204515001	204520000	0.211513	0.275761	0.064248	2257	chr2:204515001-204520000						RAPH1
42288	chr1	211435001	211440000	0.585931	0.518048	-0.0678824	2266	chr1:211435001-211440000			RCOR3 // RCOR3 // RCOR3 // RCOR3		NM_001136225 // NM_001136224 // NM_001136223 // NM_018254	RCOR3
277104	chr7	151840001	151845000	0.449076	0.50799	0.0589147	2274	chr7:151840001-151845000		BX640742 // Y08836 // AK022687	KMT2C		NM_170606	GALNT11
4603	chr1	23010001	23015000	0.550393	0.621814	0.0714208	2314	chr1:23010001-23015000						C1QB
425350	chr13	41950001	41955000	0.711364	0.596161	-0.115203	2317	chr13:41950001-41955000			NAA16		NM_024561	NAA16
112647	chr3	70775001	70780000	0.438911	0.384206	-0.0547051	2318	chr3:70775001-70780000						LINC01212
125686	chr3	135970001	135975000	0.722171	0.639526	-0.0826455	2327	chr3:135970001-135975000	PCCB // PCCB	X73424 // S67325 // BC005909 // BC013768 // AB209009 // BC053661 // AK295312 // AK130359 // AK225733 // AK303079 // AK225215 // AL831978 // JF432277 // CU680676 // AK302522	PCCB // PCCB		NM_001178014 // NM_000532	MSL2
98549	chr3	285001	290000	0.164727	0.232219	0.0674924	2327	chr3:285001-290000		CR749682 // AL359583	CHL1 // CHL1 // CHL1		NM_001253387 // NM_006614 // NR_045572	CHL1
244596	chr6	160420001	160425000	0.805912	0.698968	-0.106944	2333	chr6:160420001-160425000		GQ166646	IGF2R // AIRN // AIRN		NM_000876 // NR_047514 // NR_047511	IGF2R
34581	chr1	172900001	172905000	0.113551	0.192251	0.0786997	2344	chr1:172900001-172905000						FASLG
29416	chr1	147075001	147080000	0.786192	0.696916	-0.0892752	2362	chr1:147075001-147080000			BCL9		NM_004326	BCL9
507755	chr17	38565001	38570000	0.76421	0.670473	-0.0937374	2368	chr17:38565001-38570000			TOP2A		NM_001067	GJD3
265212	chr7	92380001	92385000	0.837767	0.741319	-0.0964482	2370	chr7:92380001-92385000			CDK6 // CDK6		NM_001145306 // NM_001259	FAM133B
339081	chr10	15005001	15010000	0.821936	0.729116	-0.0928201	2391	chr10:15005001-15010000			MEIG1		NM_001080836	MEIG1
34794	chr1	173965001	173970000	0.808591	0.71621	-0.0923814	2412	chr1:173965001-173970000						RC3H1
283015	chr8	22255001	22260000	0.550525	0.488657	-0.0618674	2436	chr8:22255001-22260000			SLC39A14 // SLC39A14 // SLC39A14 // SLC39A14		NM_001128431 // NM_001135154 // NM_015359 // NM_001135153	SLC39A14
232722	chr6	101050001	101055000	0.732795	0.651632	-0.0811626	2495	chr6:101050001-101055000			ASCC3		NM_006828	SIM1
275612	chr7	144380001	144385000	0.824231	0.733549	-0.0906816	2526	chr7:144380001-144385000			TPK1 // TPK1		NM_022445 // NM_001042482	NOBOX
571794	chr22	29190001	29195000	0.785362	0.699178	-0.0861833	2547	chr22:29190001-29195000		CU674467 // AK093842 // AX748333	XBP1 // XBP1		NM_001079539 // NM_005080	CCDC117
476271	chr15	74035001	74040000	0.481555	0.411438	-0.0701172	2600	chr15:74035001-74040000			C15orf59		NM_001039614	CD276
242845	chr6	151665001	151670000	0.848484	0.756454	-0.09203	2618	chr6:151665001-151670000			AKAP12 // AKAP12		NM_005100 // NM_144497	AKAP12
84361	chr2	172545001	172550000	0.832764	0.742627	-0.0901368	2630	chr2:172545001-172550000	DYNC1I2 // DYNC1I2 // DYNC1I2	AY037160 // AK308008 // AK298561 // AK096579 // AK075323 // AF250307 // BC109375 // AF134477 // AK316119 // BC015038 // CU677189 // AM393760 // AB463591 // BT007130	DYNC1I2 // DYNC1I2 // DYNC1I2 // DYNC1I2 // DYNC1I2 // DYNC1I2 // DYNC1I2		NM_001271788 // NM_001378 // NM_001271786 // NM_001271790 // NM_001271789 // NM_001271785 // NM_001271787	DYNC1I2
139352	chr4	6275001	6280000	0.516077	0.618444	0.102367	2632	chr4:6275001-6280000		EU176760	WFS1 // WFS1		NM_006005 // NM_001145853	WFS1
346947	chr10	54335001	54340000	0.702106	0.612845	-0.0892615	2671	chr10:54335001-54340000						DKK1
540679	chr19	43905001	43910000	0.548568	0.621374	0.072806	2693	chr19:43905001-43910000			TEX101		NM_031451	TEX101
72533	chr2	113405001	113410000	0.842126	0.752183	-0.0899433	2708	chr2:113405001-113410000		DQ894238 // DQ893562 // CU676486 // DQ575834 // BC016752	SLC20A1		NM_005415	SLC20A1
351110	chr10	75150001	75155000	0.793482	0.708798	-0.0846831	2722	chr10:75150001-75155000			ANXA7 // ANXA7		NM_004034 // NM_001156	TTC18
42080	chr1	210395001	210400000	0.438252	0.491023	0.0527708	2726	chr1:210395001-210400000						SYT14
111452	chr3	64800001	64805000	0.809552	0.722673	-0.0868791	2757	chr3:64800001-64805000			ADAMTS9-AS2 // MIR548A2		NR_038264 // NR_030317	MIR548A2
452446	chr14	62260001	62265000	0.828793	0.741128	-0.0876655	2778	chr14:62260001-62265000			SNAPC1		NM_003082	SNAPC1
182610	chr5	31410001	31415000	0.836505	0.748719	-0.0877865	2830	chr5:31410001-31415000		AF130047	DROSHA // DROSHA		NM_001100412 // NM_013235	CDH6
194955	chr5	93135001	93140000	0.198646	0.263407	0.0647605	2865	chr5:93135001-93140000			FAM172A // FAM172A // FAM172A // FAM172A		NM_001163417 // NR_028080 // NM_001163418 // NM_032042	POU5F2
395545	chr12	26780001	26785000	0.555621	0.620381	0.0647595	2882	chr12:26780001-26785000			ITPR2		NM_002223	SSPN
278723	chr8	795001	800000	0.735539	0.662159	-0.0733806	2887	chr8:795001-800000			ERICH1-AS1		NR_073397	ERICH1-AS1
115422	chr3	84650001	84655000	0.748342	0.670607	-0.0777345	2895	chr3:84650001-84655000						GBE1
262079	chr7	76715001	76720000	0.501418	0.445109	-0.0563093	2914	chr7:76715001-76720000		AK024881				PMS2P9
253873	chr7	35685001	35690000	0.575938	0.499795	-0.0761426	2917	chr7:35685001-35690000			HERPUD2		NM_022373	LOC401324
198792	chr5	112320001	112325000	0.757858	0.679512	-0.0783458	2931	chr5:112320001-112325000			DCP2 // DCP2 // DCP2		NR_038352 // NM_152624 // NM_001242377	DCP2
436828	chr13	99340001	99345000	0.713455	0.639801	-0.0736547	2945	chr13:99340001-99345000			SLC15A1		NM_005073	STK24
44200	chr1	220995001	221000000	0.820476	0.736459	-0.0840164	2984	chr1:220995001-221000000						MARC1
336224	chr10	720001	725000	0.759885	0.682464	-0.0774208	3025	chr10:720001-725000			DIP2C		NM_014974	PRR26
33460	chr1	167295001	167300000	0.754757	0.673243	-0.0815143	3031	chr1:167295001-167300000	POU2F1	AY113189 // BC003571 // BC001664	POU2F1 // POU2F1 // POU2F1 // POU2F1		NM_001198786 // NM_002697 // NR_037163 // NM_001198783	POU2F1
