# Supplementary material for: Complement component C5a induces aberrant epigenetic modifications in renal tubular epithelial cells accelerating senescence by Wnt4/βcatenin signaling after ischemia/reperfusion injury
Source: Aging (Albany NY). 2019 Jul 8;11(13):4382–406. doi: 10.18632/aging.102059 (PMC6660044; doi:10.18632/aging.102059)
Supplement: Supplementary Table 2 [file aging-11-102059-s002.xlsx]

## Sheet: Foglio2
cgid	Chromosome	omosome	Start	Strand	mean.RPTEC_bas	mean.RPTEC_C5a_24h	mean.diff C5a	diffmeth.p.val	combinedRank	mean.covg.RPTEC_bas	mean.covg.RPTEC_C5a_24h
cg10202113	chr1	1	98520089	-	0.548275	0.643651	0.0953763	0.0034136	24581	14.3333	14
cg27584013		1	23012439	+	0.550393	0.621814	0.0714208	0.0469866	41759	13.3333	12.6667
cg17081489		1	177953700	+	0.184948	0.252979	0.0680306	0.00632167	3983	14.6667	11.6667
cg05041517		1	1021029	+	0.697793	0.758957	0.0611641	0.0148038	71050	10.3333	10
cg15447231		1	101537255	-	0.682965	0.739342	0.0563768	0.0211178	76065	15	9.66667
cg10586107		1	20755534	+	0.720444	0.772204	0.0517597	0.0329483	88072	14	15.3333
cg06178123		1	246684113	+	0.775881	0.826333	0.0504525	0.0359043	96844	13.6667	16.3333
cg14838017		1	160232450	+	0.12188	0.0716102	-0.0502701	0.028832	3602	19.3333	13.6667
cg09214920		1	108743318	+	0.0988845	0.047443	-0.0514415	0.0293684	3271	15	13.3333
cg21452766		1	70877088	-	0.1338	0.0822613	-0.0515386	0.00602084	3251	13	20
cg08938976		1	247095660	+	0.11271	0.0608177	-0.0518918	0.00530679	3152	12.6667	13.6667
cg04407776		1	84465009	+	0.237017	0.184642	-0.052375	0.0128472	8387	12.6667	12.3333
cg00599812		1	1385047	-	0.759213	0.706394	-0.0528188	0.0413907	84545	14.3333	14.3333
cg26878995		1	168106731	+	0.165538	0.112485	-0.0530535	0.0397353	2879	13.3333	10.3333
cg20688709		1	236227534	-	0.122613	0.0686187	-0.0539945	0.00230187	2678	13.6667	13.3333
cg21784383		1	217311172	+	0.178952	0.123891	-0.0550616	0.0231012	2478	15.6667	17.3333
cg06776953		1	149859104	-	0.0850694	0.0300026	-0.0550668	3.47521e-05	2477	11.6667	16.6667
cg06656994		1	179713176	+	0.258386	0.203172	-0.055214	0.021457	9321	16	15
cg26398921		1	221065480	-	0.159373	0.102827	-0.056546	0.038776	2585	15	17.3333
cg17026763		1	5940173	+	0.878071	0.821482	-0.0565893	0.0149051	91671	10.6667	12.3333
cg23911417		1	226448825	-	0.856795	0.798556	-0.0582392	0.0133825	86600	11.6667	11.3333
cg09267708		1	155883625	+	0.795575	0.737065	-0.0585103	0.0457004	79349	20	12
cg18881776		1	28052146	-	0.153654	0.0930274	-0.0606264	0.0133642	1633	12	13
cg15149095		1	210111672	-	0.156675	0.0955492	-0.0611254	0.0376951	2478	12	12.6667
cg15627300		1	52309831	+	0.825625	0.764115	-0.06151	0.040986	78149	13.6667	14
cg16634661		1	46954794	-	0.172256	0.104052	-0.0682034	0.044832	3222	13	13.6667
cg09245989		1	2454811	+	0.730335	0.661928	-0.0684067	0.00813431	57928	8.33333	10
cg21547845		1	6618814	+	0.496587	0.42758	-0.0690075	0.0452653	28742	10.6667	10.6667
cg00155504		1	11160113	+	0.15252	0.0770968	-0.0754232	0.00510523	579	20	22
cg15691596		1	152051335	-	0.783722	0.704872	-0.0788499	0.0140284	51964	10.6667	11.6667
cg18814252		1	147075680	-	0.786192	0.696916	-0.0892752	0.0453786	42353	13.6667	13.3333
cg07797372		1	64602654	-	0.691829	0.598894	-0.0929354	0.034682	30519	12.3333	10
cg17157234		1	99974022	+	0.744045	0.649269	-0.0947751	0.0450125	33991	12	10
cg18798487		1	91087610	-	0.75413	0.649553	-0.104578	0.0383075	28445	17.3333	12
cg22227726		1	202939745	+	0.708978	0.586545	-0.122433	0.0349553	16659	11.3333	13
cg14412622	chr2	2	75873674	-	0.388894	0.465654	0.0767598	0.0443664	19236	11	10
cg08540943		2	232120301	+	0.692432	0.761271	0.0688394	0.0429225	60929	14	14.6667
cg04640885		2	145273345	+	0.227279	0.294464	0.0671848	0.0411878	7293	21	10.6667
cg26305745		2	90108355	+	0.17806	0.243837	0.0657769	0.0419295	3960	12.6667	12
cg15706424		2	469781	-	0.651249	0.71042	0.0591711	0.0425817	68234	11	10.6667
cg15824291		2	182521222	-	0.126409	0.183919	0.0575098	0.019992	2179	14.6667	15.6667
cg23258173		2	5506547	+	0.678857	0.732471	0.0536144	0.0427707	79894	11	18.3333
cg19177627		2	63274709	-	0.715636	0.768763	0.0531276	0.0437787	85143	10	10.6667
cg02556067		2	96970985	-	0.117869	0.168674	0.0508046	0.046383	3444	13.3333	10
cg03608583		2	232761931	-	0.885697	0.835464	-0.0502323	0.0369025	103925	11.6667	10.6667
cg22464182		2	148602625	+	0.105766	0.0547751	-0.0509913	0.0152717	3395	16	15
cg07720856		2	232572668	+	0.124355	0.0732504	-0.0511045	0.02065	3371	17	15.6667
cg08606075		2	677472	+	0.0932005	0.040119	-0.0530815	0.0388403	2871	12.3333	14
cg10460130		2	242625978	-	0.157966	0.102843	-0.0551224	0.0457727	3321	16.6667	13
cg04982052		2	151352580	+	0.874579	0.81868	-0.0558994	0.0461357	92503	10.6667	12
cg12830438		2	100017168	+	0.88408	0.82792	-0.05616	0.035922	93076	12	9.33333
cg08625382		2	222437387	+	0.102005	0.0450817	-0.0569232	0.00662642	2153	12.3333	13
cg25533547		2	73053217	+	0.1223	0.0632565	-0.0590434	0.0267592	1854	14	15.3333
cg09423703		2	71115230	-	0.0951389	0.034456	-0.0606829	0.0194515	1626	16.6667	13.3333
cg11646294		2	238473873	+	0.831893	0.768042	-0.0638512	0.0217989	75354	16.6667	15.3333
cg08525207		2	3622752	+	0.129991	0.0642026	-0.0657888	0.0249503	1409	18.6667	18
cg25331250		2	6402937	-	0.787345	0.712324	-0.0750209	0.024016	56431	9.66667	9
cg00022308		2	27851831	+	0.139675	0.0627091	-0.076966	0.00197398	522	19	17
cg13501907		2	176997504	+	0.700969	0.616862	-0.0841073	0.014578	38259	16.3333	16.3333
cg14228484		2	97427445	+	0.883763	0.788589	-0.0951741	0.0106276	46348	12.3333	12.3333
cg10536369		2	170335894	-	0.212171	0.115587	-0.0965844	0.00864786	350	10.6667	13
cg04879348		2	109124576	-	0.719809	0.605438	-0.114371	0.0245958	20692	11.3333	10
cg14187813		2	97651611	+	0.645522	0.500956	-0.144567	0.00462799	7306	6.33333	8.33333
cg04572206	chr3	3	75705108	-	0.33787	0.459159	0.121288	0.0429484	3996	13	18.6667
cg19474983		3	97850378	+	0.574521	0.646772	0.0722507	0.0171872	43797	12.3333	12.3333
cg12352399		3	25689774	+	0.144715	0.212796	0.0680804	0.0216964	1883	14.3333	15.3333
cg22595315		3	31494702	+	0.623573	0.68479	0.061217	0.0171111	62020	14	13
cg27143246		3	169489583	+	0.143332	0.200142	0.0568104	0.0290074	3339	13.6667	15.6667
cg11133962		3	156202516	-	0.147401	0.202078	0.0546779	0.0396645	4043	11.6667	12.3333
cg17858811		3	16642995	-	0.111326	0.161464	0.0501385	0.0353524	3645	13.6667	14.3333
cg07399369		3	142838082	-	0.121637	0.0713689	-0.0502685	0.00307503	3603	10.6667	11.6667
cg22319470		3	13521370	+	0.0842625	0.0321822	-0.0520803	0.00616528	3103	11.6667	16.6667
cg21133608		3	179390381	-	0.790729	0.738063	-0.052665	0.0472057	88678	8.66667	11.6667
cg19450479		3	5018817	-	0.140967	0.0866638	-0.0543027	0.0076124	2620	14.3333	20.6667
cg14187685		3	196669272	-	0.166651	0.110909	-0.055742	0.00554826	2356	16.3333	14
cg07608658		3	9851477	-	0.177291	0.118152	-0.0591385	0.0413465	2865	14	14.3333
cg25127083		3	13521250	-	0.113646	0.0527371	-0.0609089	0.047118	3495	11.3333	10.6667
cg17216301		3	109036087	-	0.836551	0.774618	-0.0619334	0.0480955	78679	21.3333	17
cg21483906		3	33758870	-	0.19756	0.134029	-0.0635311	0.0240075	1870	9	10
cg00911981		3	142297824	+	0.123068	0.0587582	-0.0643096	0.00385782	1266	15	12
cg11776124		3	101395209	+	0.204143	0.139332	-0.0648107	0.0159183	1988	9.66667	7.66667
cg23144143		3	112276088	+	0.755538	0.689601	-0.0659373	0.032177	64002	10.3333	9.33333
cg07645194		3	194407045	+	0.170644	0.100983	-0.0696614	0.0481836	3607	20.6667	17
cg24942186		3	55521373	+	0.162137	0.0916882	-0.070449	0.0342109	2158	17.3333	17
cg07803814		3	11746226	+	0.731493	0.64889	-0.0826029	0.021637	42854	10.6667	11
cg20193910		3	179501588	+	0.717072	0.628989	-0.0880836	0.0278505	36551	12.3333	15.3333
cg10742605		3	18485411	+	0.166045	0.0772349	-0.0888103	0.0322695	2008	17.3333	11
cg20172468		3	127768253	+	0.78311	0.67507	-0.10804	0.0147639	28741	15.6667	21.3333
cg25772474		3	12835187	+	0.6958	0.5806	-0.1152	0.00230222	18684	13	9
cg21513138		3	195460818	-	0.662847	0.543203	-0.119644	0.041074	14788	16	16
cg15006455		3	47656135	+	0.789725	0.669595	-0.12013	0.0499938	22999	13.6667	16
cg16185750	chr4	4	174912071	+	0.569376	0.654113	0.0847372	0.0117003	32949	14	10.3333
cg15782267		4	40664171	-	0.759428	0.820157	0.0607296	0.045339	78691	11.6667	10
cg16004439		4	165851186	-	0.7897	0.738867	-0.0508333	0.0432622	91909	11	15.3333
cg09382966		4	146127289	+	0.893658	0.840346	-0.0533116	0.0471992	98987	10	14
cg11765430		4	331396	+	0.128188	0.0746326	-0.0535552	0.016996	2763	11.6667	8.66667
cg23119967		4	164110821	+	0.708079	0.65157	-0.0565087	0.0340814	71996	10	9.66667
cg04932464		4	6788637	-	0.814203	0.757012	-0.0571912	0.0084244	83565	13.3333	12
cg19764048		4	5053152	-	0.134813	0.0772056	-0.0576075	0.0194404	2048	10.6667	9
cg26816491		4	55499684	+	0.802761	0.744724	-0.0580361	0.0112053	80946	19	12
cg25187227		4	40058080	+	0.130693	0.0710811	-0.059612	0.00865168	1776	15	12.6667
cg07817208		4	20006267	+	0.792557	0.732678	-0.0598789	0.00981274	76892	13.3333	11
cg07229402		4	154369277	-	0.774832	0.713255	-0.061577	0.0358807	72247	15.3333	12.6667
cg22443651		4	40453161	+	0.693761	0.626629	-0.0671313	0.0296995	55326	15.6667	9.33333
cg03584891		4	156680256	+	0.13773	0.0668339	-0.0708965	0.00503405	793	16.3333	15.3333
cg20808462		4	2243252	-	0.126884	0.0549582	-0.0719262	0.000209929	751	18	20.6667
cg05763228		4	155664954	+	0.156509	0.0747447	-0.0817642	0.00363587	388	15.3333	15.3333
cg19406117		4	77228196	+	0.185169	0.102922	-0.0822473	0.0454586	3289	14.6667	13.6667
cg00905042		4	174114298	+	0.765471	0.682469	-0.0830023	0.0289774	45947	10.6667	10.3333
cg09691861		4	77870047	+	0.167798	0.0840267	-0.0837711	0.00880503	360	13.3333	11
cg01125563		4	768644	+	0.700606	0.590038	-0.110568	0.0198048	21084	12	7.66667
cg22134413	chr5	5	150180641	-	0.174689	0.232172	0.0574824	0.0363351	5566	13.6667	13.6667
cg05522848		5	68710359	+	0.783914	0.838943	0.0550289	0.0446706	90112	14	14.3333
cg00992297		5	141061943	-	0.0844136	0.0329844	-0.0514292	0.0357438	3274	13.6667	13.3333
cg10660256		5	78407683	+	0.105538	0.0540136	-0.0515245	0.00279595	3256	18	13.3333
cg16773899		5	83680326	+	0.105086	0.0533207	-0.0517654	0.0120822	3189	13	12.3333
cg22504933		5	16990305	-	0.762137	0.710262	-0.0518757	0.0292927	86606	11	10.3333
cg13425677		5	56112090	+	0.170721	0.117905	-0.0528155	0.039202	2939	16.3333	13.3333
cg03931027		5	138609848	+	0.148011	0.0951604	-0.0528505	0.000946513	2926	16.6667	15.3333
cg14995055		5	140240593	+	0.86013	0.805108	-0.0550228	0.0471636	92433	9	13
cg07185596		5	145214440	-	0.130609	0.0702275	-0.0603811	0.0463427	3400	17	19
cg13649383		5	138628911	-	0.797615	0.737178	-0.0604362	0.00845192	76584	15.6667	13.6667
cg13684113		5	114944822	-	0.854757	0.794086	-0.0606713	0.0270678	82576	9.66667	6
cg12565821		5	258374	+	0.817751	0.757063	-0.0606873	0.00872507	78484	12.3333	13
cg04844516		5	19887438	-	0.880097	0.817719	-0.0623785	0.0456764	82676	9.66667	12.3333
cg02380878		5	1136618	+	0.663623	0.601094	-0.062529	0.026829	57572	12	10.3333
cg11156873		5	1491579	-	0.640771	0.57452	-0.0662508	0.0262903	49888	16.3333	12.3333
cg26188571		5	179050811	+	0.142202	0.0752823	-0.0669201	0.0232806	1274	13.3333	14.3333
cg12905935		5	180262649	-	0.828864	0.760106	-0.0687588	0.0192946	68431	7.33333	9.66667
cg00260114		5	95998495	+	0.150041	0.0811054	-0.068936	0.0146732	910	8.33333	11
cg07516956		5	134915085	+	0.149061	0.0800634	-0.0689979	0.0139457	905	16.6667	19.6667
cg06819704		5	159707559	-	0.768905	0.698883	-0.0700216	0.00627642	60343	9.66667	10.3333
cg21271026		5	508185	+	0.80995	0.737084	-0.0728665	0.0394458	61288	17.6667	16
cg01165402		5	115912383	+	0.284259	0.210982	-0.0732765	0.0409515	4628	18.6667	18.6667
cg16671301		5	1289283	+	0.741205	0.667195	-0.0740099	0.00702521	52621	15	13.3333
cg00632914		5	178359659	+	0.799137	0.72029	-0.0788469	0.04496	53567	11.6667	11.6667
cg23211257		5	1284888	+	0.809164	0.729781	-0.0793824	0.0100674	54016	13.3333	13.3333
cg03683256		5	141061941	-	0.179825	0.0750029	-0.104822	0.022177	1195	10.3333	8.66667
cg11356547		5	32355062	-	0.515995	0.409998	-0.105997	0.0221667	10012	14.6667	17
cg05935660	chr6	6	111928756	+	0.425898	0.506515	0.0806163	0.0191709	20931	13.6667	15.3333
cg23250715		6	47444224	+	0.169655	0.24964	0.0799851	0.0122942	1802	14.3333	13.6667
cg03718042		6	33453703	-	0.671542	0.746496	0.0749536	0.0197708	52170	11	8.66667
cg17673897		6	10418121	+	0.650016	0.717418	0.0674015	0.0303712	57721	18.3333	16
cg08866665		6	169689892	-	0.627784	0.692458	0.0646737	0.0190262	58270	9.33333	8
cg04744592		6	88499909	-	0.285269	0.349856	0.0645869	0.0238011	14390	9.66667	13.3333
cg22121557		6	28584138	+	0.333822	0.389271	0.0554491	0.047787	27547	8.33333	9.66667
cg18472160		6	139690828	+	0.100327	0.153132	0.0528043	0.0342911	2941	15.3333	9.66667
cg15496763		6	32711102	-	0.820976	0.87271	0.0517339	0.0393966	99638	18.6667	18.3333
cg15936731		6	28938132	-	0.815166	0.765093	-0.0500733	0.039099	96266	10.3333	13
cg01115099		6	30525126	+	0.113154	0.062531	-0.0506226	0.00639945	3497	13	15.3333
cg09741240		6	3000097	-	0.258128	0.207307	-0.0508213	0.0238479	12174	15	18.6667
cg23721712		6	30227967	+	0.104251	0.0530659	-0.0511854	0.00399874	3342	15	15
cg00415582		6	43027202	+	0.109385	0.0573009	-0.0520838	0.00278168	3101	8	12.6667
cg26501027		6	150326334	+	0.0835229	0.0307498	-0.0527732	0.0392686	2952	11	13.3333
cg01161248		6	30585371	-	0.0974188	0.0443381	-0.0530807	0.00047549	2872	11.6667	10
cg10904109		6	146755494	-	0.141522	0.0858373	-0.055685	0.0378759	2495	15.3333	15
cg23736055		6	3743284	-	0.12989	0.0741571	-0.0557334	0.0416325	2898	13.3333	8.66667
cg24608684		6	130686865	+	0.141568	0.0857813	-0.055787	0.0355991	2345	15.6667	14
cg06827060		6	68597028	-	0.783423	0.725881	-0.057542	0.0161357	79482	5.33333	10
cg04885678		6	33046344	+	0.840971	0.782416	-0.0585546	0.0276786	84344	11	12.6667
cg16322666		6	37320657	-	0.811505	0.751996	-0.0595086	0.00972476	79596	9.66667	8.33333
cg12416929		6	108882205	-	0.34811	0.287159	-0.060951	0.0300098	16684	18	14
cg26952697		6	148881461	+	0.185268	0.123506	-0.0617624	0.035249	2240	15.3333	12.6667
cg15059225		6	17312156	+	0.182987	0.117543	-0.0654434	0.0232392	1269	11.3333	16.3333
cg14274896		6	143833011	+	0.14664	0.0797503	-0.0668899	0.00216986	1057	17.6667	12.6667
cg20652607		6	108485837	+	0.141833	0.0734046	-0.0684282	0.0263465	1507	21	20.6667
cg11891393		6	100911727	+	0.249479	0.180352	-0.0691275	0.0265396	3545	10	11.3333
cg15076318		6	32847788	-	0.303893	0.233609	-0.0702833	0.0154588	6929	7.33333	9.33333
cg06757935		6	167709237	+	0.8026	0.729967	-0.0726334	0.0365693	60800	9.66667	11.3333
cg20882455		6	107777859	-	0.739625	0.629553	-0.110072	0.00659071	24257	9	13.6667
cg22377814	chr7	7	28091875	-	0.731404	0.802286	0.0708829	0.0213198	62848	8.33333	11.3333
cg03808172		7	96339361	-	0.159131	0.222946	0.0638152	0.0297783	3164	12.6667	12
cg22255773		7	154557556	-	0.798821	0.853208	0.0543873	0.0105564	92777	12.6667	10
cg15057818		7	158087993	+	0.730268	0.784227	0.0539584	0.0449747	85496	8.33333	13.6667
cg11995490		7	1165405	+	0.817992	0.766329	-0.051663	0.040229	93681	10.6667	10
cg25039694		7	157192974	-	0.868898	0.816928	-0.0519701	0.02956	98762	13.6667	14
cg18100127		7	130125764	-	0.858256	0.805808	-0.0524479	0.028021	96730	15.6667	15.3333
cg02273422		7	130353956	+	0.110952	0.0565506	-0.0544015	0.0147249	2597	12.6667	15
cg00016814		7	145875026	-	0.877312	0.817246	-0.0600653	0.0375825	85844	7.66667	8.66667
cg07737566		7	50847263	+	0.837237	0.776058	-0.0611792	0.0272195	79898	12.3333	8
cg14523772		7	77666867	+	0.781251	0.719234	-0.0620177	0.0465288	72342	12	11
cg08115430		7	25902329	+	0.120634	0.0578191	-0.0628149	0.00697889	1410	14.6667	15.3333
cg24542725		7	99724244	-	0.179838	0.1138	-0.0660378	0.00830336	1122	18.6667	10.3333
cg02048505		7	48075568	+	0.10896	0.0366965	-0.072264	0.0323215	2011	8	10.6667
cg22847190		7	2598508	-	0.18788	0.113486	-0.0743945	0.00142281	625	15.3333	16
cg00343349		7	57639252	+	0.707061	0.61926	-0.087801	0.0202224	35874	11.3333	9.66667
cg05518778		7	148730143	+	0.767597	0.670904	-0.0966928	0.0381663	34745	8	12.3333
cg24791283		7	98945891	-	0.797436	0.68142	-0.116016	0.0316466	25481	10.6667	10.3333
cg24114458		7	92380449	-	0.765999	0.577992	-0.188006	0.0302087	5174	11.6667	5.66667
cg21498547	chr8	8	1651128	-	0.603553	0.674043	0.0704908	0.0170453	48930	12.3333	10
cg03506193		8	104033864	-	0.124661	0.178032	0.0533713	0.0358494	2799	14.3333	12.6667
cg16926147		8	133142477	+	0.633328	0.686574	0.0532464	0.0364194	74666	17.3333	12.3333
cg03387593		8	67529475	-	0.733461	0.682621	-0.0508408	0.0391894	84920	13	11
cg02226697		8	126010266	-	0.11038	0.0594861	-0.0508935	0.0252028	3417	14.6667	13.3333
cg08462127		8	2017365	-	0.169623	0.113946	-0.0556765	0.0294769	2372	16.6667	11.3333
cg01674777		8	1861037	-	0.864228	0.806599	-0.0576288	0.0463006	88446	13.6667	17.3333
cg09127592		8	27164804	+	0.814016	0.755425	-0.0585908	0.0203075	81327	10.3333	10
cg17004897		8	145844854	-	0.832088	0.772651	-0.0594368	0.0152114	81992	12	14
cg10620501		8	37620046	+	0.171572	0.108171	-0.0634009	0.0113464	1352	18.6667	16.3333
cg25947184		8	1697459	+	0.342154	0.268863	-0.0732908	0.0111006	8955	12	14
cg20254251		8	144557206	-	0.738689	0.654305	-0.084384	0.0278838	41976	13	11.6667
cg17662034		8	74207518	+	0.153966	0.0634438	-0.090522	0.035371	2251	15.6667	17
cg26974427		8	37727552	-	0.764528	0.671555	-0.092973	0.0161799	37192	16.6667	14.6667
cg14505667	chr9	9	130981745	+	0.67122	0.738615	0.0673952	0.023169	60209	10.6667	14.3333
cg14255700		9	95378254	-	0.615587	0.675355	0.0597675	0.04345	62903	10	17
cg14447733		9	75553431	-	0.704645	0.757534	0.0528892	0.0461604	84206	16	14
cg13751548		9	37005935	+	0.665869	0.718176	0.0523072	0.0357982	80382	8	14.6667
cg13799898		9	136858673	+	0.128024	0.0757982	-0.0522256	0.0270956	3067	13.3333	15.6667
cg13799838		9	84217219	-	0.840842	0.787931	-0.0529111	0.0491186	93978	11	11.3333
cg11825926		9	129374641	-	0.158296	0.0998087	-0.0584868	0.0191698	1924	9.66667	15
cg26396617		9	133815188	-	0.150675	0.0872862	-0.0633892	0.0220048	1354	12.6667	12.3333
cg02362017		9	131154347	-	0.833491	0.767251	-0.0662405	0.0278664	72156	16.6667	16
cg14079243		9	88358062	-	0.722602	0.636227	-0.0863744	0.0346138	38509	10.6667	9.66667
cg03533632		9	140217142	+	0.835795	0.737375	-0.0984199	0.012269	39486	12	13.3333
cg16252933	chr10	10	61625176	+	0.21912	0.279223	0.0601024	0.0371868	8991	16.6667	14.6667
cg08866557		10	49647167	-	0.68005	0.739989	0.059939	0.0410946	70629	15	13.3333
cg24568842		10	90967160	+	0.118823	0.0686578	-0.0501648	0.00396984	3638	13	13.6667
cg23939236		10	2357224	+	0.858637	0.808118	-0.0505195	0.0279249	100405	11	13
cg06400229		10	125327578	+	0.84424	0.790402	-0.0538373	0.0189893	92749	14	12.3333
cg07959124		10	75006630	-	0.140906	0.0867761	-0.0541296	0.0100079	2655	23	17.3333
cg05213267		10	574291	+	0.766801	0.712611	-0.0541901	0.0246168	83111	9.66667	11.3333
cg16832958		10	126479779	-	0.117622	0.0633966	-0.0542252	0.0255291	2638	13.3333	12.3333
cg09154334		10	131341043	-	0.733937	0.679387	-0.0545498	0.0361766	78469	13	11.6667
cg15859008		10	134640937	+	0.793196	0.737122	-0.0560741	0.0240597	83049	10.3333	7.66667
cg04599297		10	26505442	+	0.252296	0.195412	-0.0568845	0.0208585	7754	12.3333	14.3333
cg18038372		10	131404769	-	0.887948	0.831011	-0.0569373	0.0436898	92174	7.33333	11
cg00761859		10	33541169	+	0.799753	0.742689	-0.0570642	0.0309363	82138	10.3333	10.3333
cg22247188		10	71813603	+	0.161346	0.100655	-0.0606911	0.0177296	1624	13.6667	6.33333
cg26864388		10	91589226	+	0.810728	0.749613	-0.0611151	0.0172315	77077	12	12
cg03897392		10	134803718	-	0.783781	0.722397	-0.0613839	0.0194365	73575	13	10.3333
cg27479949		10	1105842	-	0.854076	0.79226	-0.0618156	0.0498102	80763	11.6667	10.6667
cg12072262		10	129379353	+	0.82093	0.756352	-0.0645788	0.0166139	73084	12.3333	11
cg02635786		10	115939284	-	0.784005	0.717711	-0.0662941	0.0438543	66784	12	13.3333
cg22621161		10	116654257	+	0.563192	0.496852	-0.0663394	0.0375344	39893	9.33333	10
cg09063434		10	682486	+	0.822143	0.754771	-0.067372	0.0446128	69523	16.6667	14.3333
cg24663455		10	131214929	+	0.789238	0.719961	-0.0692763	0.0466539	63462	11	11
cg02491398		10	73720419	+	0.52727	0.456208	-0.0710624	0.0393448	30598	9.33333	11.3333
cg17444479		10	134429869	-	0.853714	0.781956	-0.0717571	0.0182369	67208	12	10
cg01154537		10	95462167	-	0.16031	0.0881353	-0.072175	0.0427444	2997	14.3333	12.6667
cg24032568		10	133766053	-	0.806257	0.733874	-0.0723838	0.0391805	61459	13	11.3333
cg13521018		10	134429846	-	0.814457	0.741539	-0.072918	0.0383914	61709	9.33333	14.3333
cg13415566		10	125423240	+	0.311243	0.237884	-0.0733597	0.0381797	6393	12	14
cg23400208		10	60936031	-	0.187582	0.111651	-0.0759315	0.00698965	563	19	18.3333
cg18173044		10	114535504	+	0.772327	0.684978	-0.0873491	0.0159637	42673	16	15.6667
cg01656216		10	31273710	+	0.521881	0.431379	-0.0905015	0.0358887	16697	13	14
cg09479793		10	15005691	-	0.821936	0.729116	-0.0928201	0.0284348	42724	11	12
cg19592742		10	1034166	-	0.22781	0.133467	-0.0943426	0.00578473	447	8	11.3333
cg13609017		10	69868769	+	0.804897	0.709844	-0.0950531	0.0198001	39296	11.6667	13
cg09950208		10	130841235	+	0.751539	0.652669	-0.0988697	0.0478111	31815	13	15.3333
cg23533270		10	78635553	-	0.628627	0.52581	-0.102817	0.0150709	19344	11.6667	11.6667
cg07578073		10	11232505	+	0.765642	0.649466	-0.116176	0.0106388	23156	13	10
cg17439770		10	1383257	+	0.822643	0.695664	-0.126979	0.0117773	22167	15.3333	15
cg11015348	chr11	11	25070714	-	0.620956	0.731801	0.110845	0.0369236	23281	12.3333	9
cg20315690		11	124707157	+	0.226445	0.309029	0.0825837	0.0200788	3971	11.6667	10.3333
cg03044533		11	96065844	+	0.116833	0.171101	0.0542684	0.0229186	2631	12.6667	13.6667
cg03143849		11	2904951	-	0.678544	0.730457	0.0519125	0.0344683	82638	13.3333	12.6667
cg18285636		11	76414904	-	0.847088	0.794921	-0.0521666	0.00788287	95980	10.6667	9
cg23818792		11	124632405	+	0.108863	0.0566755	-0.0521879	0.00613352	3076	17	18.3333
cg08795962		11	93862716	+	0.0762903	0.0228768	-0.0534135	0.00177472	2789	10	9.66667
cg14860397		11	75917982	+	0.125666	0.0713585	-0.0543074	0.0378297	2617	15.6667	12.6667
cg01110103		11	121440223	+	0.850676	0.796341	-0.0543344	0.0270881	92596	12.3333	10
cg24252148		11	68081257	+	0.132849	0.072422	-0.0604273	0.00103317	1658	12.6667	11
cg06339248		11	57435803	-	0.142057	0.0814549	-0.0606023	0.012344	1635	19	18.3333
cg01616682		11	15095017	+	0.134868	0.0721192	-0.062749	0.00575715	1418	16	12.3333
cg25025968		11	4116056	+	0.148465	0.0850105	-0.0634549	0.0224162	1345	17	15.3333
cg23073111		11	64073390	-	0.318617	0.254108	-0.0645086	0.0235053	10912	10	14.6667
cg25413298		11	517070	+	0.545327	0.478251	-0.0670761	0.0458662	36751	9.66667	10.3333
cg19233923		11	63753598	-	0.187426	0.119778	-0.067648	0.0471423	3498	13.3333	13.3333
cg21092834		11	107462721	-	0.135114	0.0673577	-0.0677564	0.00144571	987	16	15.3333
cg12071328		11	20690930	+	0.138835	0.0673816	-0.0714536	0.00409373	772	13.6667	12
cg26053083		11	14995770	-	0.148368	0.0763176	-0.07205	0.00400445	747	9.66667	9
cg20856882		11	129149916	+	0.141472	0.0670594	-0.0744129	0.0482285	3609	17.6667	14.6667
cg10078703		11	35963440	-	0.614843	0.531379	-0.0834638	0.0338646	29984	13.3333	15
cg12502403		11	63607025	+	0.15921	0.0710008	-0.0882088	0.00293347	263	15.6667	15
cg02471078		11	688159	+	0.683188	0.552343	-0.130845	0.0277655	12329	17.6667	10.6667
cg07289018	chr12	12	51640971	+	0.183552	0.246548	0.0629968	0.0474508	4891	18.3333	20
cg21043657		12	33590837	+	0.704872	0.765739	0.0608669	0.0274323	72244	19.3333	12.3333
cg19188297		12	51219239	+	0.104919	0.15884	0.0539209	0.0388295	2691	14.3333	19.6667
cg10516061		12	129277643	+	0.878198	0.827801	-0.0503971	0.0204173	102790	10.3333	5.66667
cg22722933		12	53473604	-	0.116875	0.0635493	-0.0533257	0.00651511	2815	11.3333	16
cg01352472		12	51154575	+	0.842974	0.786725	-0.0562483	0.0103635	88408	9.66667	8
cg21139845		12	7053993	+	0.17483	0.117647	-0.0571835	0.0405782	2773	11.6667	21
cg12216749		12	110338002	-	0.146017	0.0880091	-0.0580081	0.00632552	1993	12	14.3333
cg14043509		12	4141051	+	0.135218	0.0746046	-0.0606135	0.00553377	1634	15.6667	14
cg18849213		12	132401816	-	0.788332	0.726761	-0.0615714	0.0388631	73838	13	11.6667
cg26413076		12	10515091	+	0.711169	0.648105	-0.063064	0.0214377	62675	15	14.3333
cg12386876		12	110352770	+	0.796554	0.732818	-0.0637365	0.0242709	71618	10.6667	12.6667
cg08894685		12	123718369	+	0.131852	0.0676217	-0.0642302	0.0117531	1278	13.3333	11.3333
cg27277183		12	121688441	+	0.854754	0.789281	-0.0654731	0.0312327	75507	9.33333	10
cg16448126		12	123921461	-	0.134616	0.0679841	-0.0666314	0.0416625	2905	15.3333	16.3333
cg09297514		12	121678558	+	0.78994	0.721616	-0.0683237	0.0115991	64758	11.6667	8
cg27441225		12	54422350	+	0.854801	0.778737	-0.0760636	0.0110302	62149	12.6667	10.6667
cg27638509		12	132093988	-	0.734407	0.619909	-0.114498	0.0466041	21706	15	11
cg01750221		12	109985316	+	0.679516	0.559597	-0.119919	0.0114282	15737	11.3333	10
cg13647831	chr13	13	111720013	+	0.355256	0.452006	0.0967506	0.0249372	8758	11.3333	9.66667
cg02100381		13	111025711	+	0.168577	0.235481	0.0669036	0.00510449	3237	12.6667	15.6667
cg09196346		13	23499332	-	0.579344	0.644216	0.0648712	0.0379025	52105	15.3333	14.6667
cg22301261		13	50655392	-	0.14027	0.0891347	-0.0511355	0.00115285	3360	12.3333	13.3333
cg14293633		13	100002256	-	0.854999	0.798895	-0.0561044	0.0137747	90042	10	11.6667
cg02949523		13	111334467	+	0.814247	0.747679	-0.066569	0.0185958	69734	10.6667	13
cg12380458		13	25563268	+	0.657119	0.59021	-0.0669089	0.0186278	51168	12.6667	10.6667
cg06481158		13	49549440	-	0.221759	0.152412	-0.0693466	0.0200159	2088	10.6667	12.3333
cg09911332		13	44542478	-	0.779483	0.699718	-0.079765	0.00793271	50535	13.3333	12.3333
cg15852787	chr14	14	52014313	-	0.173303	0.242198	0.0688952	0.0413952	3206	9	10.6667
cg02319043		14	36277474	-	0.130533	0.18875	0.0582174	0.0418056	2914	18	20.3333
cg13725062		14	58894377	-	0.0826202	0.133408	0.0507882	0.0367547	3451	10	11
cg03009524		14	56645829	+	0.876721	0.826418	-0.0503036	0.0363387	102810	13	14.6667
cg23749163		14	77563968	-	0.152299	0.100509	-0.0517899	0.0175243	3185	14.3333	15.6667
cg14532720		14	102771657	-	0.125653	0.0655927	-0.0600598	0.0369212	2401	15.6667	17.3333
cg10932242		14	100659592	+	0.116516	0.0424254	-0.0740904	0.00836937	636	13	10
cg19947357		14	99864952	+	0.722873	0.633403	-0.0894692	0.0337281	36043	13.6667	16.3333
cg09993711		14	64746129	+	0.751413	0.656024	-0.0953886	0.0381471	34240	13.6667	16.3333
cg21485150		14	45357076	-	0.619796	0.510458	-0.109338	0.0125099	15820	12.3333	12
cg19995856		14	91574593	-	0.737303	0.619106	-0.118197	0.0301834	20234	14	11
cg03237845	chr15	15	57377660	-	0.263388	0.354063	0.0906746	0.037885	4622	13	13.3333
cg04655834		15	25031239	-	0.481574	0.549876	0.0683023	0.0410522	36097	15.6667	12.6667
cg00587665		15	100533223	+	0.716692	0.778475	0.0617829	0.029842	72369	14	19.3333
cg08662227		15	81411066	+	0.709536	0.761066	0.0515294	0.0333474	87112	14	15.3333
cg10676084		15	27017560	-	0.117759	0.066898	-0.0508612	0.0134979	3422	17.6667	19.6667
cg08208917		15	42565872	+	0.109643	0.0543295	-0.055313	0.0181051	2434	12	11
cg20037575		15	96886839	-	0.76537	0.70359	-0.0617799	0.0414745	70890	9.33333	11
cg10003284		15	99559956	-	0.794807	0.732395	-0.0624125	0.0489704	73292	10.3333	15.3333
cg01743110		15	65294293	+	0.853863	0.788355	-0.0655078	0.0385959	75372	14.6667	16.3333
cg21293562		15	96901651	-	0.754313	0.679774	-0.0745389	0.033652	53495	16	15.3333
cg07572579		15	68116058	+	0.241399	0.165213	-0.0761857	0.0206276	1969	19	15.6667
cg05677943	chr16	16	56736034	-	0.118161	0.172922	0.0547605	0.0468159	3461	13.6667	11.3333
cg00310215		16	51185346	+	0.097541	0.0434487	-0.0540924	0.0437262	3098	11.6667	9
cg12642006		16	11350118	+	0.244897	0.186466	-0.0584306	0.0430591	6283	17.6667	15.6667
cg01214050		16	54155639	-	0.797797	0.738567	-0.0592298	0.0398053	78472	11.3333	11.3333
cg08340023		16	23098187	-	0.851363	0.791751	-0.0596116	0.0315315	83794	10.3333	15.6667
cg27379896		16	89224639	+	0.805431	0.744356	-0.0610744	0.0102838	76506	13.3333	12.3333
cg05325390		16	23464715	-	0.150149	0.088471	-0.061678	0.0124703	1521	14	14
cg26654559		16	86492912	-	0.151702	0.0879473	-0.0637547	0.0311705	1914	11.6667	12.6667
cg08186341		16	70563092	-	0.788182	0.721699	-0.0664821	0.0302363	66986	12.3333	12.6667
cg06057750		16	2731600	+	0.7195	0.652163	-0.0673371	0.0281273	58022	11.6667	13.6667
cg27136643		16	3493534	+	0.555949	0.481448	-0.0745002	0.0311011	30908	13.3333	13.3333
cg02198051		16	30674811	-	0.601574	0.516263	-0.0853109	0.024762	27289	14	19.3333
cg23839398		16	87800492	-	0.789984	0.703929	-0.0860549	0.0410675	45551	9.66667	7.33333
cg09596866		16	3493336	+	0.27315	0.184796	-0.0883534	0.0159659	1696	10.3333	8
cg17211761	chr17	17	1096626	+	0.245249	0.299139	0.0538895	0.0329565	15635	8.33333	11.6667
cg04547425		17	73043127	-	0.103829	0.0525156	-0.0513131	0.00563668	3306	9.33333	8.66667
cg10755085		17	72732722	+	0.114493	0.0624756	-0.0520175	0.00645213	3113	11.3333	9
cg23874373		17	77952488	-	0.790775	0.738025	-0.0527507	0.0447391	88509	14.6667	11.6667
cg13129662		17	48227708	+	0.157978	0.103168	-0.0548101	0.0286678	2524	11.6667	13.3333
cg11656992		17	79818741	-	0.113405	0.0568346	-0.0565709	0.00601551	2214	19.6667	14
cg19663942		17	78009347	+	0.115057	0.0564477	-0.0586094	0.00312719	1908	14.6667	10.6667
cg19285217		17	62075604	-	0.142696	0.0839073	-0.0587884	0.0391565	2624	10.6667	16.3333
cg26910488		17	66243590	-	0.151709	0.0913883	-0.0603203	0.00423218	1667	12.3333	19.3333
cg03325014		17	81028962	+	0.699641	0.632884	-0.0667572	0.0254518	56446	10.3333	10
cg02243096		17	26592726	+	0.815097	0.74464	-0.0704564	0.0285012	64785	13.3333	13.3333
cg05483915		17	80145575	-	0.810143	0.738619	-0.0715235	0.0467713	62901	13.6667	12
cg08189100		17	2057082	-	0.794433	0.717572	-0.0768615	0.00962475	55175	13.6667	10.3333
cg20994084		17	79269488	+	0.129178	0.0482584	-0.0809193	0.0264733	1518	16.3333	13.6667
cg06833613		17	1042351	-	0.7016	0.61321	-0.0883898	0.0293672	34826	9.66667	11
cg15259920		17	73997287	-	0.767931	0.671338	-0.0965933	0.0237628	34861	11	9.33333
cg06390079		17	19648855	+	0.524953	0.425873	-0.0990802	0.00687348	13070	13.3333	14.3333
cg06716358		17	79204738	+	0.737192	0.637147	-0.100044	0.0177967	29834	10.3333	12.6667
cg26522239	chr18	18	21199097	-	0.176437	0.125862	-0.0505749	0.012554	3512	15	16.6667
cg11726572		18	658602	-	0.100054	0.0465728	-0.0534807	0.014737	2781	17	16
cg13022174		18	23671059	-	0.15607	0.10128	-0.0547894	0.0142281	2526	13.6667	14.6667
cg06329143		18	48556512	+	0.308748	0.225821	-0.0829271	0.0195046	3899	13.3333	14
cg25515450		18	21030986	+	0.775501	0.67671	-0.0987906	0.00722848	33948	14.3333	13.3333
cg13253660	chr19	19	53837494	+	0.130514	0.193202	0.0626882	0.0163746	1791	13.6667	15.3333
cg11761572		19	39390455	+	0.129437	0.0790096	-0.0504273	0.0494652	3724	13.6667	10.6667
cg06116806		19	38145827	-	0.103364	0.0521772	-0.0511864	0.0308148	3341	11.3333	14.6667
cg04713352		19	36055013	-	0.229619	0.177811	-0.0518079	0.0131664	7838	16.6667	12
cg19607320		19	50412816	-	0.838495	0.784985	-0.0535102	0.0408843	92683	8	8
cg21549639		19	45394156	-	0.129146	0.0752329	-0.0539132	0.00835661	2694	17.6667	13
cg15977798		19	30862847	-	0.871443	0.815877	-0.0555659	0.0310272	92723	10.6667	8.33333
cg08554936		19	46519866	+	0.161327	0.0909905	-0.0703367	0.0295395	1775	18.6667	15.6667
cg25599269		19	12075882	+	0.140686	0.0692618	-0.071424	0.00812858	774	15.6667	11.3333
cg03340026		19	1403530	+	0.226764	0.153038	-0.0737258	0.0177972	1714	14.3333	15.3333
cg08610415		19	38270207	-	0.147247	0.0682759	-0.0789714	0.00118715	450	19.3333	14.6667
cg20466739	chr20	20	50421586	-	0.544389	0.601308	0.0569188	0.0379463	57294	11	11
cg14743710		20	44806780	-	0.772661	0.824777	0.0521159	0.0384439	93622	14.6667	14.6667
cg11162385		20	25604740	+	0.176703	0.125151	-0.051553	0.0337659	3248	14.3333	14
cg05325193		20	22558233	-	0.112566	0.054046	-0.0585196	0.00691141	1917	13.3333	15
cg09955523		20	39948552	+	0.83104	0.769473	-0.0615671	0.0366236	78626	13	15.3333
cg17162808		20	33266296	+	0.84802	0.783133	-0.0648868	0.0461913	75630	11.3333	13.3333
cg06026331		20	60912101	+	0.805682	0.722676	-0.0830062	0.0282025	49915	14.6667	12.6667
cg22330467		20	42143015	-	0.588012	0.465222	-0.12279	0.0220421	9383	16.3333	13.3333
cg03282968		20	61675672	-	0.67736	0.543498	-0.133862	0.0354632	11194	17	12.3333
cg12708807	chr21	21	34978286	+	0.128775	0.179613	0.0508384	0.0252438	3449	9	12.3333
cg04128483		21	38446099	+	0.164458	0.11371	-0.0507477	0.00733532	3460	16	12.6667
cg17727929		21	38069338	+	0.137721	0.0632037	-0.0745168	0.0222161	1198	13.3333	13.3333
cg26278151	chr22	22	31316184	-	0.221327	0.284898	0.0635706	0.0126945	7933	12.6667	9.33333
cg15970156		22	22863219	+	0.140468	0.086038	-0.0544304	0.0205175	2592	18.3333	19
cg16001977		22	32340332	+	0.179522	0.12116	-0.0583614	0.0484043	3617	15.6667	11.6667
cg17064564		22	29710817	-	0.147259	0.0871075	-0.0601516	0.00691097	1683	13.6667	17
cg04371950		22	45602057	+	0.520568	0.459162	-0.0614066	0.043137	39891	13.3333	14.6667
cg12868583		22	44320504	-	0.179895	0.116286	-0.0636087	0.0153292	1331	9	7.33333
cg26759223		22	46448690	-	0.187638	0.119309	-0.0683289	0.00387426	987	18.3333	12
cg00742649		22	29190731	+	0.785362	0.699178	-0.0861833	0.0470665	44974	12	17.3333
